# Supplementary material
Source: PubMed Central journal article supplement (PMC4066979)
Supplement: NIHMS525002-supplement-02.pdf [file NIHMS525002-supplement-02.pdf]

***P. falciparum***

A

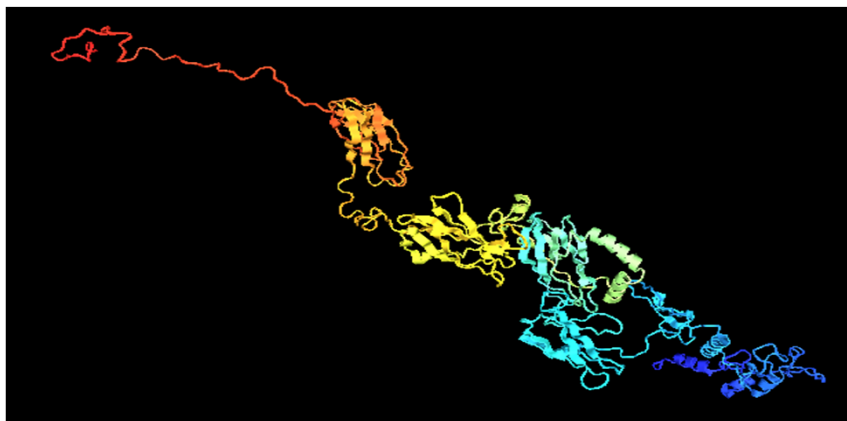

C-score=-2.53

B

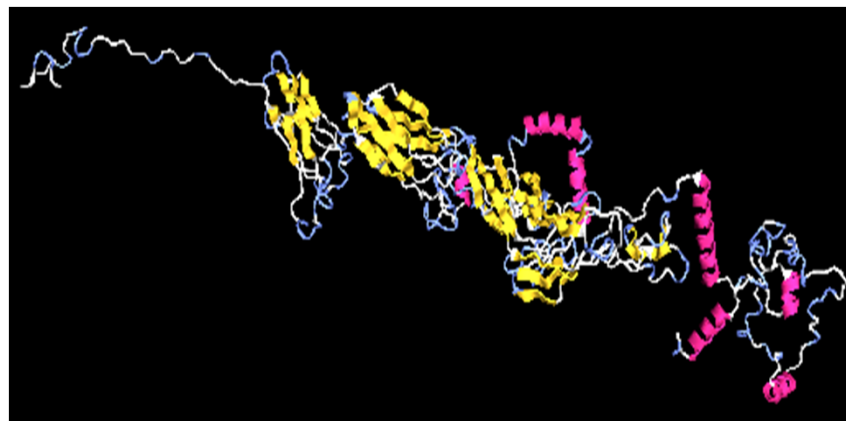

0.42±0.14 (TM-score)

Predicted binding sites : 620M, 621N, 632I and 686K

***P. vivax***

C

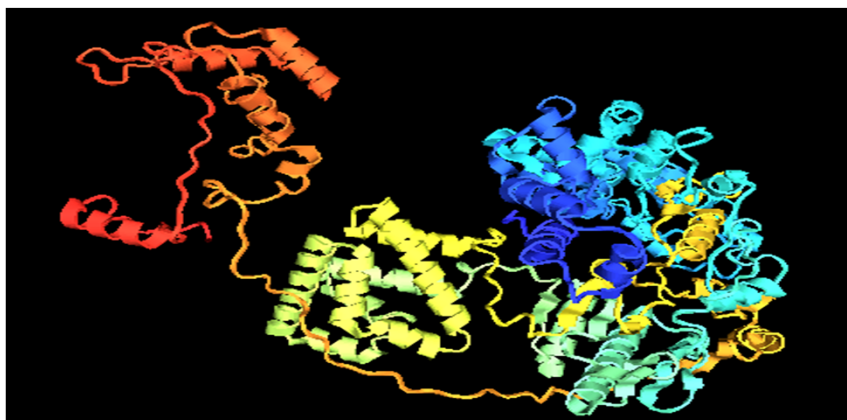

C-score=-0.51

D

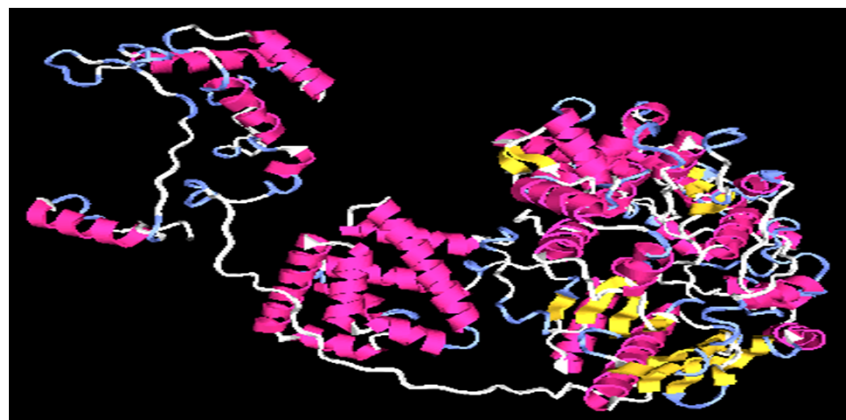

0.65±0.13 (TM-score)

Predictive binding sites: 449D, 454Y, 455E and 456K
