# Supplementary material
Source: PubMed Central journal article supplement (PMC4066979)
Supplement: NIHMS525002-supplement-04.pdf [file NIHMS525002-supplement-04.pdf]

Fig. S3B

***P. vivax***

```

AA      MRVNIIIFS FVFLVKGHVAKSDDKKSFSKLF DANLVNNYEKLFKVIKCYCLTQKGAQNEKCKQIMKDCCKLLKDG EYISTLKDL MNDLKV GKNEHVYGPNTNELKKIINFLELHKQE
PROF_sec L.EEEEE...EEE.....HH.HHHH.....LLLLL.HHHHHHHHHHHH.L.HHHHHHH.....LLL...LLL.HHHHHHHHHHHHHHH
PROF_acc .ibbbbbbbbbbb.....e....bb.b.bb.b.bb.....e.be.b.e.b.e....e...bi.b.....e.....e.b.bb.b...e.

AA      IDMLKDMIDTIKDNKAILLINGGNNPVVHKLNKKMKSLKKSVEYIQKSQDVITEQLSKHEDGVNHVLS ETFHLKGSTNKDGNELIQLGNVTENDEEHNYELGGLGVDEFVKNGIKDLFKD
PROF_sec HHHHHHHHHH.L.EEEE.LLL.HHHHHHHHHH.....HHHHHH.....LLL.....L.....LL.HHHHH.HHHHHH..
PROF_acc be.bi.bbe.bee...bb.....b.b.e.e.....b...e.b.....b.b.....b.bb...be.bbe.

AA      GEGFMDVVKTTLIQEGGGIGGELVSLIEKGKEIGEKIVDIEGMITNKHSTGNTDGTIEKLDHFKTELSYEFLLISLKGIVLS KLKDILLRVLYKTYINRYRTKAKEFGEPAPT VVSEE
PROF_sec ...HHH.....LL.HHHHHH.....E.....LL.LLL.....HHHHH.HHHHHHHHHHHHH.....LLLLL.....
PROF_acc ..b..b..bb.....bb.bb..b.....bb.b.b.b.....e.b..b.....bb..b..b..b..bbb.bb.....

AA      HYLSELKKGVLELGMKILFNKLRNLLTIVKKMFPKKFGGKKGKTEKEDTQADPN AATPETAE LSSQMLRGSVPAEDVSLMASIDSMIDEIDFYEKEIYYNPHTGAVAQVHC MDDEAEEA
PROF_sec .....LL.LLL.LLL.....LLLLLLLLL.....LLL.....LLL.....LL.L.....
PROF_acc .....e..e.....

AA      VDETVD ETVDETVD ETVDDVT EEA VDGVTDDASDEDEATEQVAEEVVDELTEEMVEQIAHEAVEKI THNAEQVAHEAVVEMTHEVVEEMAQDMANMEAVVEVAEVAQMEEIVQ
PROF_sec .....LLLLLLLLL.....LLL.....L.....LLLLL.....L..LL.....
PROF_acc .....

AA      KVVDEAA YVVEEVAH AVEEVA DAVDEAVQVEDAPENVFEGVPENVEAVT ETEE VVEA APENAEVATEEVVEATPENAEAVPENVEAVT ETEE VVEVPEN TEVATEEVVEAVPEDAEAAP
PROF_sec .....L.LLL.....L.....LL.....LLLLLLLLL.....LLLLL.LLL.....LLL.....LLLLL.....LLLLLLLLL.....
PROF_acc e.....

AA      EHTVTT EEEVETAP ENTETVPEVVEAVPEHTEVATEVVEVPENAEVATEVVEAVPENAEAAPENADPVHENA EAAPENAE PVHENA EAAPENAE PVHENA EPV PENTVEEAHVAEQV
PROF_sec LLLLLL.....LLLLLLLLL.....LLLLLLLLL.....LLLLLLLLL.....LLLLLLLLLLLLLLLLLLLLLLLLLLLLLLLLLLLLLLLLLLLLLLLLLLLLLLLLLLLLL.LLLLLL
PROF_acc .....

AA      ADNAEVA TVNVVEAV PESVEAVPESAEAVTEAVEAVPENTEAVTEAVEAAPENADVAPNTADETANTVDAPT D VTA
PROF_sec LLLLLL.....LLLLL.LLLLLLLLLLLLLLLLLLLLLLLLLLLLLLLLLLLLLLLLLLLLLLLLLLLLLLLLLLLLLL
PROF_acc .....ee

```

pJ

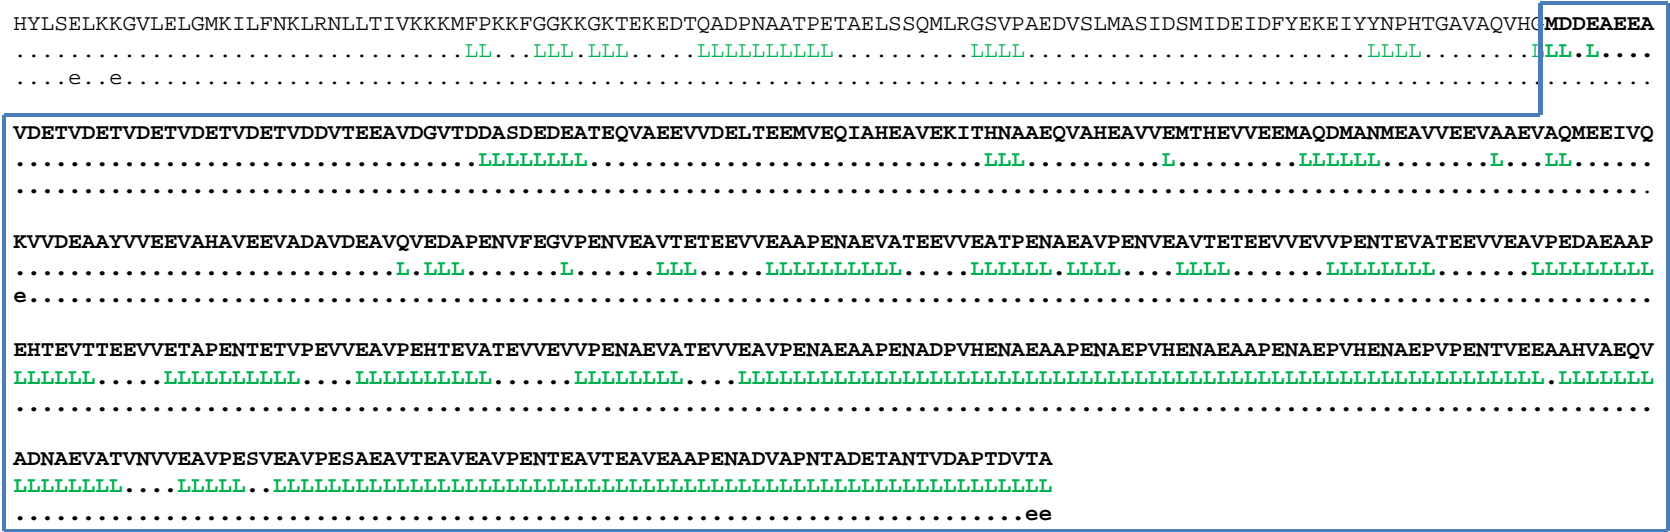

LCR
